# Supplementary material
Source: Royal Society of Chemistry journal article supplement (doi:10.1039/d6ta02648f)
Supplement: d6ta02648f1.pdf [file d6ta02648f1.pdf]

## Supplementary Information

# Data-Driven Design Strategies for Chemically Stabilizing Cathode-Coating Interfaces Employing Interpretable Machine Learning

*Sang-Hyeon Park<sup>1</sup>, Donghee Kang<sup>2</sup>, Hyun-Ki Yoon<sup>1</sup>, Yusong Choi<sup>1</sup> and Jongseo Lee<sup>1\*</sup>*

<sup>1</sup>Defense Materials and Energy Development Directorate, Agency for Defense Development, Yuseong P.O. Box 35, Daejeon, 34060, Korea. \*E-mail: [jongse7420@gmail.com](mailto:jongse7420@gmail.com)

<sup>2</sup>Chem-Bio Technology Directorate, Agency for Defense Development, Yuseong P.O. Box 35, Daejeon, 34060, Korea

## Table of Contents

**Table S1.** Number of coating-cathode pairs for data construction.

**Table S2.** Mean and median reaction energies of cathode-coating pairs.

**Table S3.** Detailed feature information considered in this study.

**Table S4.** Summary for five different classification models performance.

**Table S5.** Summary for five different regression models performance.

**Fig. S1.** Normalized occurrence (fraction) of coating materials excluded due to inconsistency between two computational methods, categorized into (a) M-O binary oxides, (b) M-O-F oxyfluorides, and (c) M-F binary fluorides. Each bar represents the fraction of a given coating material within the excluded dataset.

**Fig. S2.** Semi-global heatmap for reaction energies of group-separated cathodes with M-F binary metal fluorides.

**Fig. S3.** Semi-global heatmap for reaction energies of group-separated cathodes with M-O-F ternary metal oxyfluorides.

**Fig. S4.** Reaction energy insensitivity for working-ion species (Ca, K, Li, Mg, and Na) in cathode materials.

**Fig. S5.** Subtype-divided reaction energy distributions for (a) M-O oxides, (b) M-F fluorides, and (c) M-O-F oxyfluorides.

**Fig. S6.** Oxyfluoride coating materials reaction energy distributions according to cathode subtypes.

**Fig. S7.** Fluoride coating materials reaction energy distributions according to cathode subtypes.

**Fig. S8.** Fraction of cathode and oxide coating combinations whose reaction energy is less than -100 meV/atom.

**Fig. S9.** Representative thermodynamic reaction energy landscapes for selected cathode-coating combinations, illustrating the relationship between anion chemistry and interfacial compatibility.

**Fig. S10.** Reaction energy landscapes presented as local heatmaps for promising/commercial cathodes, where coating material classes include (a) Li-M-O ternary oxides and (b) Li-M-F ternary fluorides. Darker colors indicate more negative  $E_{\text{rxn}}$  values.

**Fig. S11.** Reaction energy distribution of Li-M-A ((a) A=oxygen and (b) A=fluorine) ternary compounds and lithium-ion battery cathode combinations. (c) Direct comparison of mean reaction energies with cathodes, between ternary oxide/fluoride compounds and binary oxide/fluoride coating materials.

**Fig. S12.** Scatter plots (blue points) for mean reaction energy and average oxidation state of metal species in (a) Li-M-O ternary and (b) M-O binary oxide materials. Red dots and error bars represent total average and standard deviations in specific oxidation states.

**Fig. S13.** (a) Distributions of reaction energy between subtype-classified cathodes and Li-M-

O ternary coatings.

**Fig. S14.** Scheme for feature selection procedure in this work

**Fig. S15.** Feature-target correlation analysis conducted in step 1 in feature selection procedure

**Fig. S16.** Feature position in correlation space

**Fig. S17.** Multicollinearity identification ( $|r| > 0.9$ ) for step 2 in feature selection

**Fig. S18.** Multicollinearity removal in step 2 of feature selection procedure

**Fig. S19.** Summary for two-step feature selection pipeline in this work

**Fig. S20.** Comparison of (a) original and (b) magnified ROC curves of trained classifiers

**Fig. S21.** Result of sensitivity analysis (AUC values) for varying classification threshold.

**Fig. S22.** Result of sensitivity analysis (F1-scores) for varying classification threshold.

**Fig. S23.** Result of sensitivity analysis (accuracy values) for varying classification threshold.

**Fig. S24.** Comparison of parity plots of five different trained regressors: Ridge, random forest, XGBoost, LightGBM, and MLP models.  $R^2$  score, RMSE, and MAE values are provided.

**Fig. S25.** Five-fold cross-validation (CV) test results for five classification models, where all cathode and coating materials in test set are completely not leaked to train set.

**Fig. S26.** Group-split test results of optimized XGBoost  $E_{\text{rxn}}$  regressor. Again, materials of test set were entirely excluded from the training set.  $R^2$  score and RMSE values are corresponding to 0.823 and 31 meV/atom, respectively.

**Fig. S27.** Top 20 important features in optimized XGBoost-based reaction energy regressor for total dataset including all of oxide, oxyfluoride, fluoride coating materials.

**Fig. S28.** Conducted ablation study where two logistic regression (LR) and XGBoost models, and use of top 1, 3, and all features are considered in regression task for predicting mutual reaction energy ( $E_{\text{rxn}}$ ). Left and right panels show the evolution of  $R^2$  scores and mean absolute error (MAE) values, respectively.

**Fig. S29.** Cumulative  $R^2$  curve of trained XGBoost-based model for reaction energy prediction.

**Table S1.** Number of coating-cathode pairs for data construction. Pairs with TRUE-labeled undergo decomposition reaction with consistent reaction energies calculated by two different methods: Total energy and formation energy considerations. Pairs with NONRXT-labeled indicates that there is no thermodynamically favorable reaction pathway to decompose. Pairs with FALSE-labeled are not considered in this study, since two different reaction energy calculations result in different values of reaction energy.

| Coating type       | TRUE  | NONRXT       | FALSE        |
|--------------------|-------|--------------|--------------|
| M-O oxides         | 17818 | 1576 (7.77%) | 896 (4.42%)  |
| M-O-F oxyfluorides | 10020 | 969 (8.30%)  | 687 (5.88%)  |
| M-F fluorides      | 7890  | 3099 (24.5%) | 1661 (13.1%) |
| Total              | 35728 | 5644         | 3244 (7.27%) |

**Table S2.** Mean and median reaction energies of cathode-coating pairs.

| Coating      | Cathodes   | # pairs | Mean $E_{\text{rxn}}$<br>(meV/atom) | Mean $E_{\text{rxn}}$<br>(meV/atom) | Median $E_{\text{rxn}}$<br>(meV/atom) |
|--------------|------------|---------|-------------------------------------|-------------------------------------|---------------------------------------|
| Oxides       | charged    | 7,728   | -96.1                               | -120.4                              | -90.9                                 |
|              | discharged | 10,090  |                                     | -77.5                               | -57.6                                 |
| Oxyfluorides | charged    | 4,234   | -63.1                               | -76.2                               | -55.2                                 |
|              | discharged | 5,786   |                                     | -53.5                               | -42.5                                 |
| Fluorides    | charged    | 3,094   | -32.9                               | -31.7                               | -22.6                                 |
|              | discharged | 4,796   |                                     | -33.8                               | -22.5                                 |

**Table S3.** Detailed feature information considered in this study. Group 1, 2, and 3 are classified as intrinsic materials properties, composition-derived descriptors, and cathode-coating interaction-based features, respectively. Abbreviations for top twenty important features are provided.

| Group            | No.               | Feature name          | Description (Abbreviation, rank)                                  | Type                                                                        |
|------------------|-------------------|-----------------------|-------------------------------------------------------------------|-----------------------------------------------------------------------------|
| 1                | 1                 | working_ion           | Li, Mg, Ca, Na, and K                                             | Categorical                                                                 |
|                  | 2                 | coating_system        | Oxide, oxyfluoride, fluoride (Coat_sys, #10)                      |                                                                             |
|                  | 3                 | cathode_type          | e.g., phosphates, fluorides (Cat_type, #16)                       |                                                                             |
|                  | Numeric           | 4                     | E_hull_cathodes (meV/atom)                                        | E <sub>hull</sub> (meV/atom) of cathodes (E_hull, #7)                       |
|                  |                   | 5                     | formE_cathode (meV/atom)                                          | Formation energies (FormE_cat, #3)                                          |
|                  |                   | 6                     | formE_coatings (meV/atom)                                         | (FormE_coat, #9)                                                            |
|                  |                   | 7 <sup>ex</sup>       | coating density (g/cm <sup>3</sup> )                              | Densities                                                                   |
|                  |                   | 8                     | cathode density (g/cm <sup>3</sup> )                              | (Density_cat, #13)                                                          |
|                  |                   | 9                     | coating bandgap (eV)                                              | Bandgaps (BG_coat, #5)                                                      |
|                  |                   | 10                    | cathode bandgap (eV)                                              | (BG_cat, #14)                                                               |
|                  |                   | 11                    | ox_coat_cation_mean                                               | Average oxidation state of cations in coating materials (Oxstate_coat, #20) |
|                  |                   | 12                    | coating_subtype                                                   | e.g., transition-metal oxides, rare-earth fluorides (Coat_sub, #18)         |
| 2                | 13                | en_cat_mean_en        | Average electronegativity (EN) in cathode (cat) materials         | Numeric                                                                     |
|                  | 14                | en_cat_wmean_en       | Weighted average EN (EN_cat_wm, #11)                              |                                                                             |
|                  | 15                | en_cat_wstd_en        | Weighted standard deviation of EN (EN_cat_wstd, #4)               |                                                                             |
|                  | 16 <sup>ex</sup>  | en_cat_min_en         | Minimum EN in cathode materials                                   |                                                                             |
|                  | 17                | en_cat_max_en         | Maximum EN (EN_cat_max, #19)                                      |                                                                             |
|                  | 18                | en_cat_range_en       | EN range (maximum-minimum)                                        |                                                                             |
|                  | 19                | en_coat_mean_en       | Average EN in coating (coat) materials (EN_coat_mean, #2)         |                                                                             |
|                  | 20                | en_coat_wmean_en      |                                                                   |                                                                             |
|                  | 21 <sup>ex</sup>  | en_coat_wstd_en       |                                                                   |                                                                             |
|                  | 22 <sup>ex</sup>  | en_coat_min_en        |                                                                   |                                                                             |
|                  | 23                | en_coat_max_en        |                                                                   |                                                                             |
|                  | 24                | en_coat_range_en      |                                                                   |                                                                             |
|                  | 25                | sto_cat_ncomp         | Stoichiometry (sto) based, Number of elements in cathode (cat)    |                                                                             |
|                  | 26 <sup>ex</sup>  | sto_cat_max_frac      | Maximum fraction of elements in given composition                 |                                                                             |
|                  | 27                | sto_cat_min_frac      | Minimum fraction of elements in given composition                 |                                                                             |
|                  | 28                | sto_cat_l2            | L2 norm (L2_cat, #15)                                             |                                                                             |
| 29               | sto_coat_ncomp    |                       |                                                                   |                                                                             |
| 30               | sto_coat_max_frac | (Minfrac_cat, #6)     |                                                                   |                                                                             |
| 31               | sto_coat_min_frac |                       |                                                                   |                                                                             |
| 32 <sup>ex</sup> | sto_coat_l2       |                       |                                                                   |                                                                             |
| 3                | 33                | sto_int_ncomp_ratio   | No. 25 / No. 29                                                   |                                                                             |
|                  | 34                | sto_int_l2_diff       | No. 28 – No. 32 ( $\Delta L2_{int}$ , #17)                        |                                                                             |
|                  | 35 <sup>ex</sup>  | sto_int_max_frac_diff | No. 26 – No. 30                                                   |                                                                             |
|                  | 36                | diff_formE            | No. 5 – No. 6                                                     |                                                                             |
|                  | 37                | diff_bandgap          | No. 9 – No. 10                                                    |                                                                             |
|                  | 38                | en_int_mean_diff      | Interactive(int), No. 13 – No. 19                                 |                                                                             |
|                  | 39                | en_int_wmean_diff     | No. 14 – No. 20 ( $\Delta EN_{wm}$ , #1)                          |                                                                             |
|                  | 40                | en_int_wstd_diff      | No. 15 – No. 21 ( $\Delta EN_{wstd}$ , #12)                       |                                                                             |
|                  | 41                | en_mismatch_score     | Specially designed electronegativity mismatch score (EN_mism, #8) |                                                                             |

<sup>ex</sup>Excluded features from the two-step feature selection procedure.

**Table S4.** Summary for five different classification models performance. Mean and test values are obtained from five-fold cross-validation and hold-out (8:2 split) test results. Standard deviation (std. dev.), mean f1 score, and AUC (area under the ROC curve) difference between validation and test results are tabulated.

| Classification models |                     |           |                     |              |                    |           |
|-----------------------|---------------------|-----------|---------------------|--------------|--------------------|-----------|
| Model                 | AUC <sub>mean</sub> | Std. dev. | AUC <sub>test</sub> | $\Delta$ AUC | f1 <sub>mean</sub> | Std. dev. |
| Logistic Regression   | 0.8737              | 0.0066    | 0.8804              | 0.0067       | 0.8656             | 0.0023    |
| Random Forest         | 0.9786              | 0.0019    | 0.9809              | 0.0023       | 0.9672             | 0.0013    |
| XGBoost               | 0.9914              | 0.0012    | 0.9923              | 0.0009       | 0.9783             | 0.0010    |
| LightGBM              | 0.9913              | 0.0011    | 0.9929              | 0.0016       | 0.9772             | 0.0011    |
| MLP                   | 0.9815              | 0.0021    | 0.9844              | 0.0029       | 0.9748             | 0.0018    |

**Table S5.** Summary for five different regression models performance. Mean and test values are obtained from five-fold cross-validation and hold-out (8:2 split) test results. R<sup>2</sup> scores, standard deviation (std. dev.), mean and test MAE (mean absolute error) values are tabulated.

| Regression models |                                |           |                                |                         |                                   |                                   |
|-------------------|--------------------------------|-----------|--------------------------------|-------------------------|-----------------------------------|-----------------------------------|
| Model             | R <sup>2</sup> <sub>mean</sub> | Std. dev. | R <sup>2</sup> <sub>test</sub> | $\Delta$ R <sup>2</sup> | MAE <sub>mean</sub><br>(meV/atom) | MAE <sub>test</sub><br>(meV/atom) |
| Ridge             | 0.6025                         | 0.0067    | 0.6076                         | 0.0051                  | 35.13                             | 35.02                             |
| Random Forest     | 0.8984                         | 0.0045    | 0.9004                         | 0.0020                  | 14.71                             | 14.51                             |
| XGBoost           | 0.9174                         | 0.0039    | 0.9176                         | 0.0002                  | 14.48                             | 14.54                             |
| LightGBM          | 0.9103                         | 0.0022    | 0.9129                         | 0.0026                  | 15.35                             | 15.07                             |
| MLP               | 0.9151                         | 0.0069    | 0.9068                         | -0.0083                 | 14.94                             | 15.25                             |

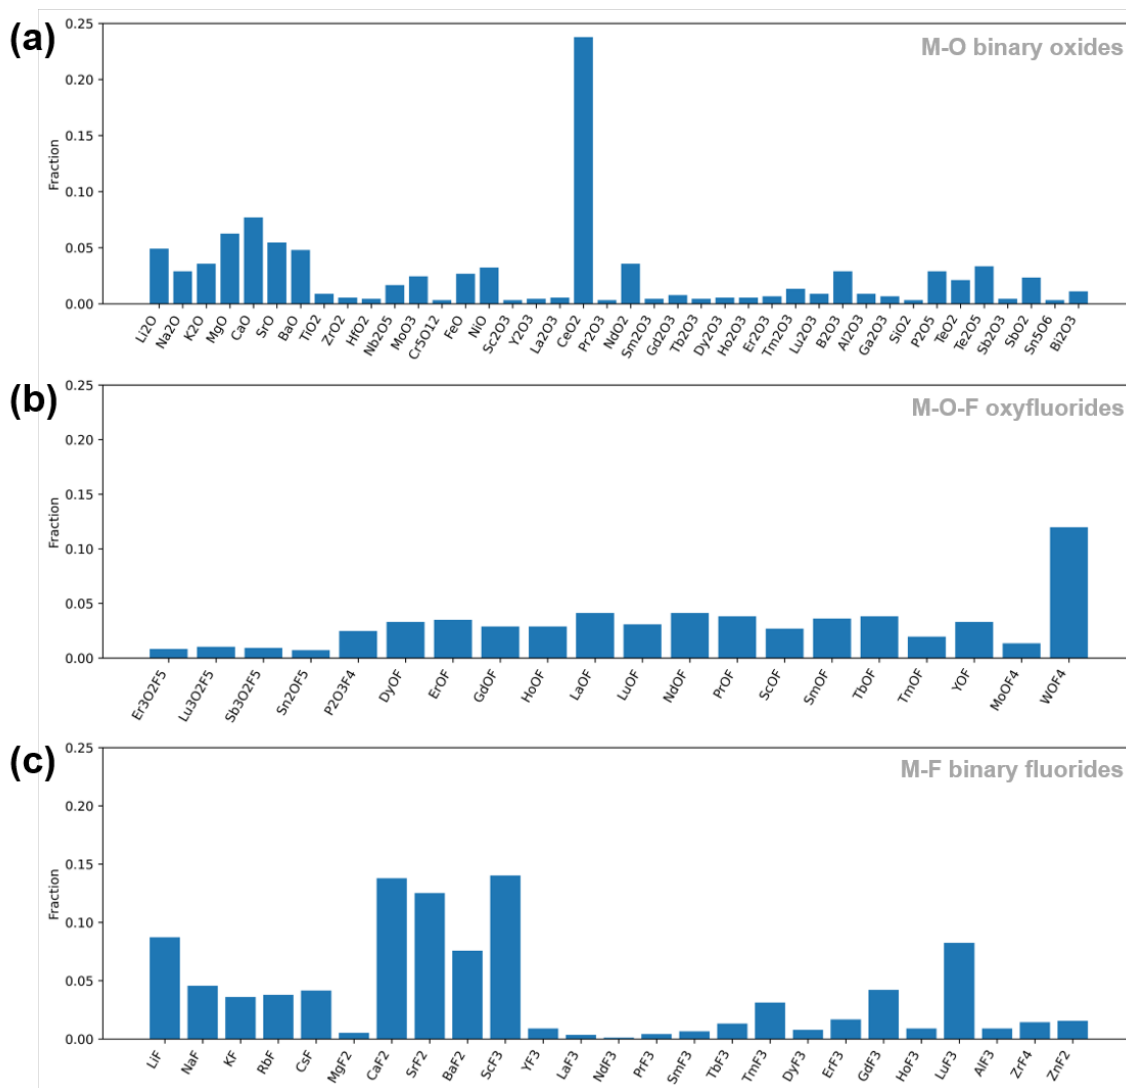

**Fig. S1.** Normalized occurrence (fraction) of coating materials excluded due to inconsistency between two computational methods, categorized into (a) M-O binary oxides, (b) M-O-F oxyfluorides, and (c) M-F binary fluorides. Each bar represents the fraction of a given coating material within the excluded dataset.

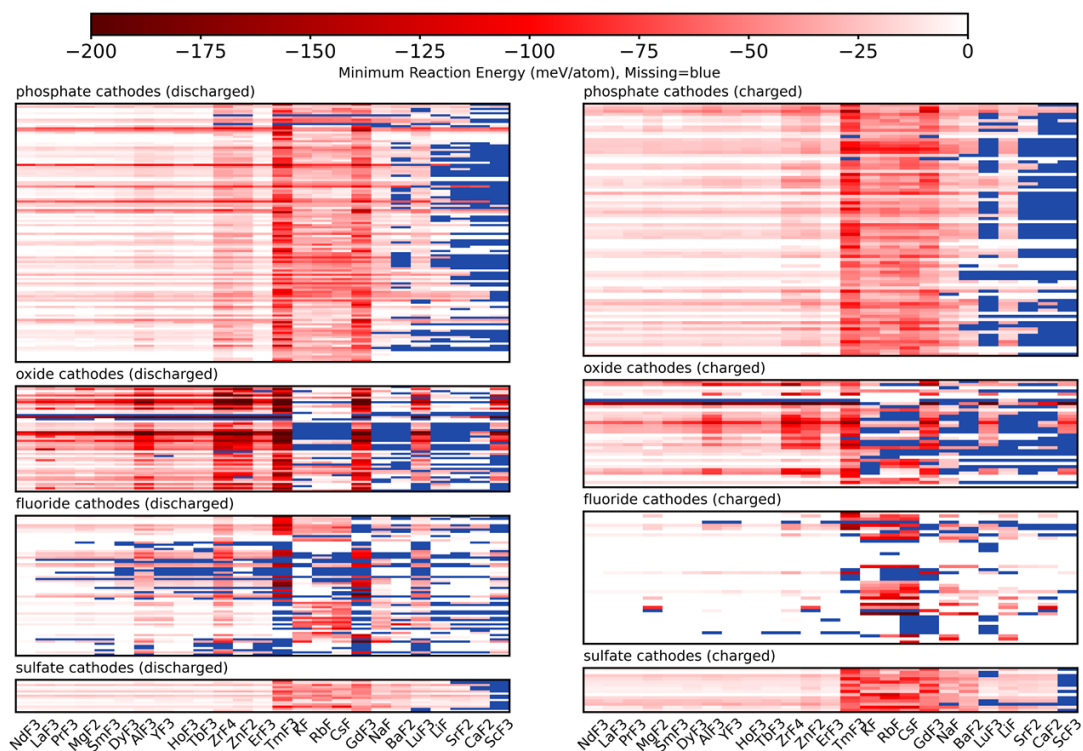

**Fig. S2.** Semi-global heatmap for reaction energies of group-separated cathodes with M-F binary metal fluorides. The darker color indicates the more negative  $E_{\text{rxn}}$  value. Left and right panels correspond to discharged and charged cathode materials, respectively.

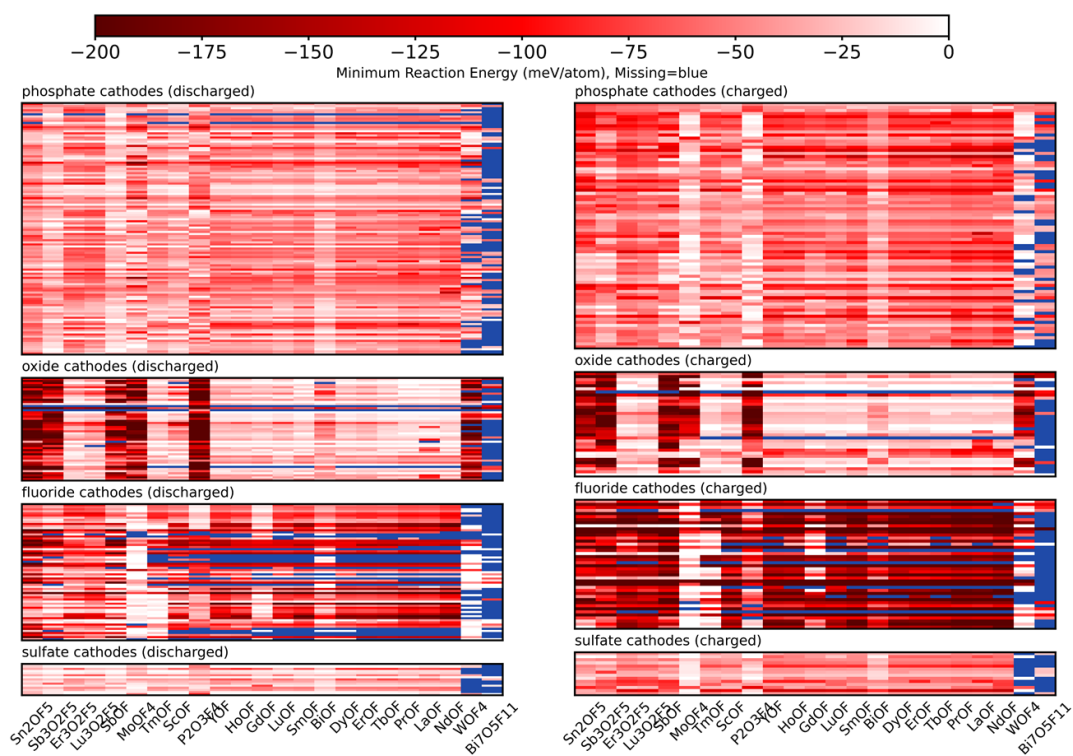

**Fig. S3.** Semi-global heatmap for reaction energies of group-separated cathodes with M-O-F ternary metal oxyfluorides. The darker color indicates the more negative  $E_{\text{rxn}}$  value. Left and right panels correspond to discharged and charged cathode materials, respectively.

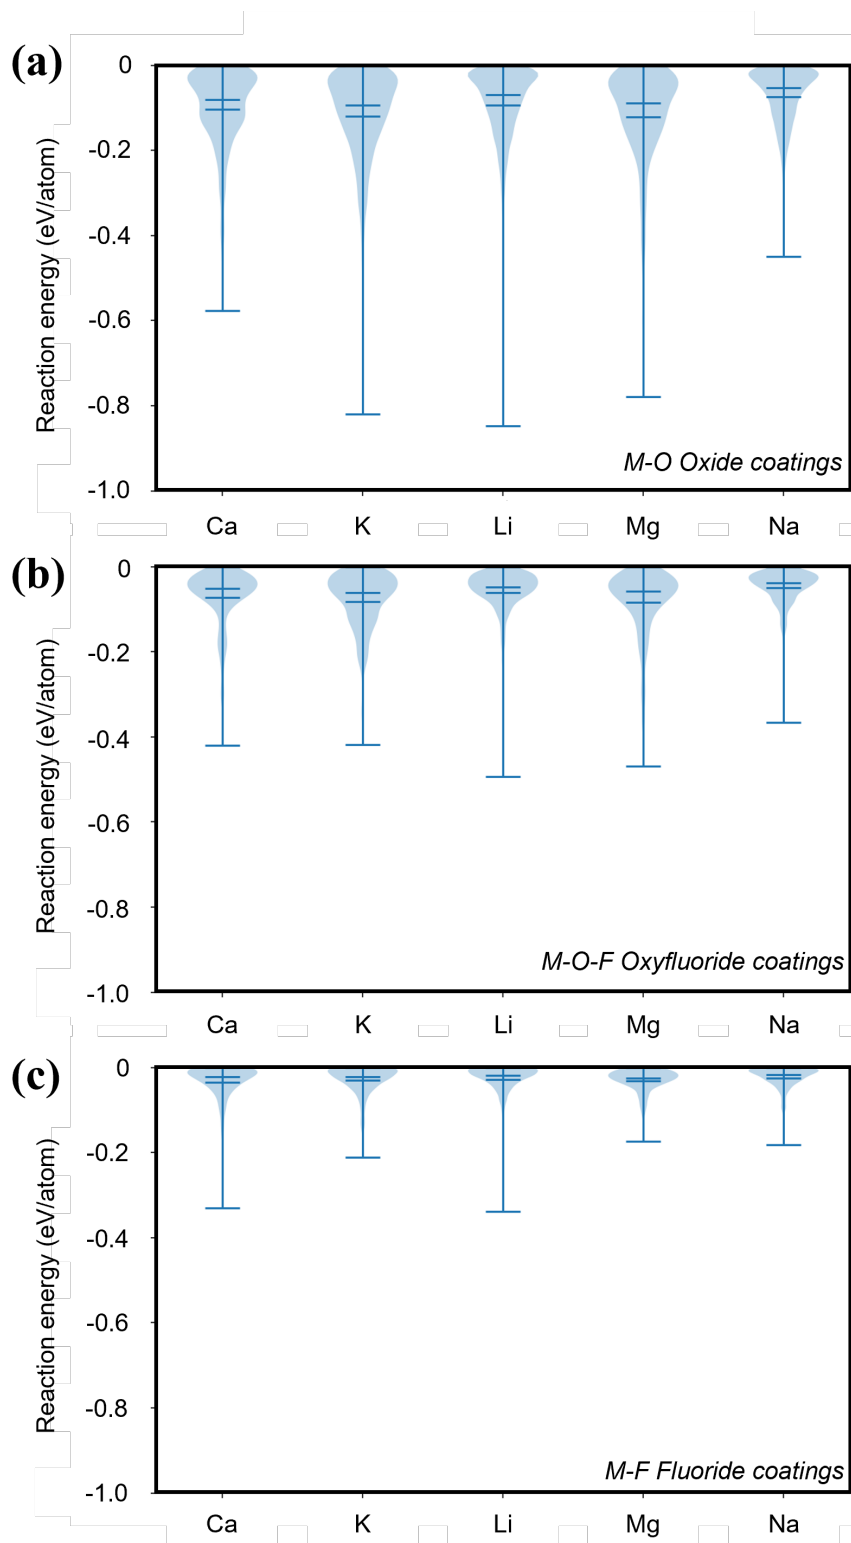

**Fig. S4.** Reaction energy insensitivity for working-ion species (Ca, K, Li, Mg, and Na) in cathode materials. (a), (b), and (c) represents reaction (decomposition) energy (eV/atom) distribution between working-ion specified cathodes and oxides, oxyfluorides, and fluorides coating materials, respectively.

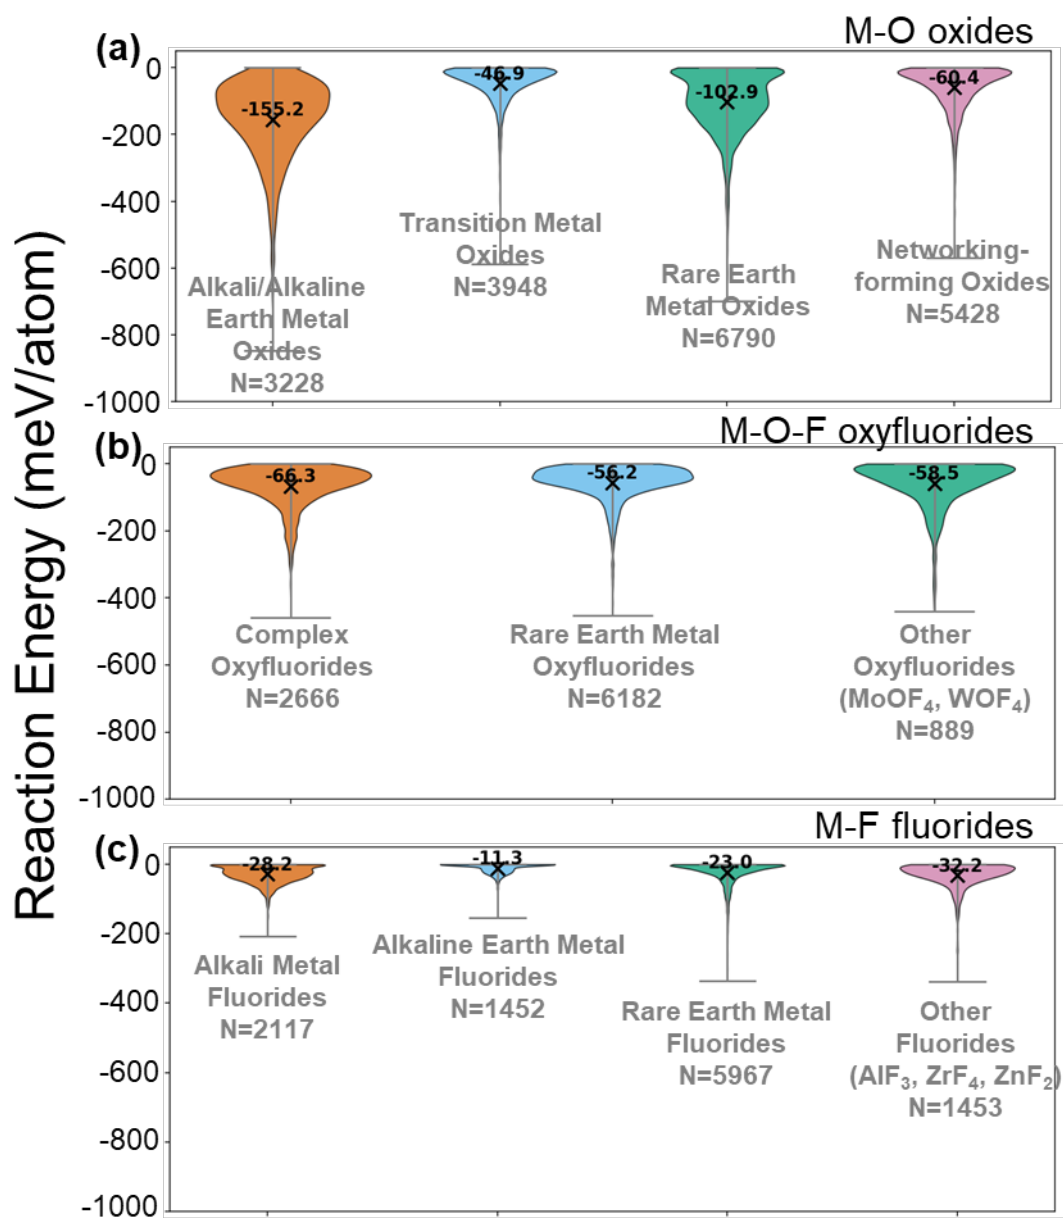

**Fig. S5.** Subtype-divided reaction energy distributions for (a) M-O oxides, (b) M-F fluorides, and (c) M-O-F oxyfluorides. Mean values are marked in cross signs, and specific compositions corresponding to each subtype is provided in figure 2b and figure 3 in the manuscript. N refers to total number of cathode-coating combinations for visualizing the distribution.

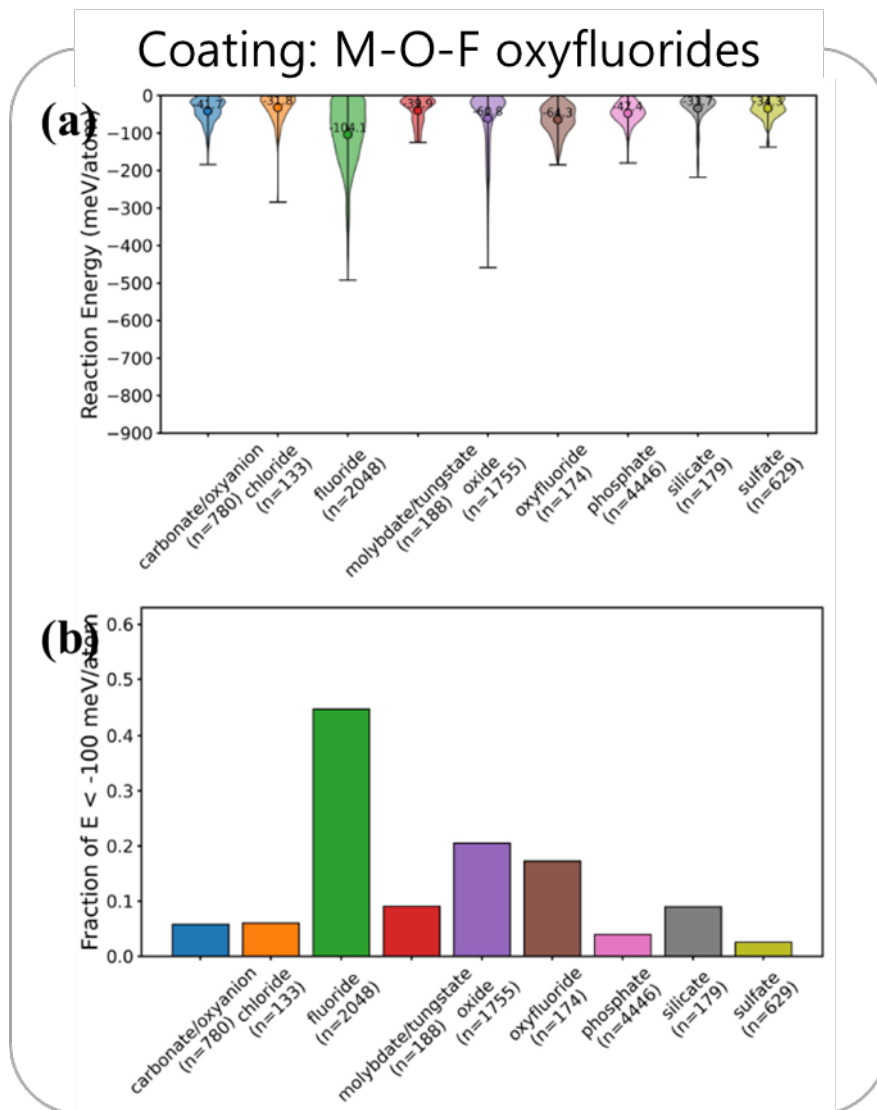

**Fig. S6.** Oxyfluoride coating materials reaction energy distributions according to cathode subtypes. (a) Distributions of reaction energy between subtype-classified cathodes and oxyfluoride coatings. (b) Fraction of cathode and oxyfluoride coating combinations whose reaction energy is less than -100 meV/atom.

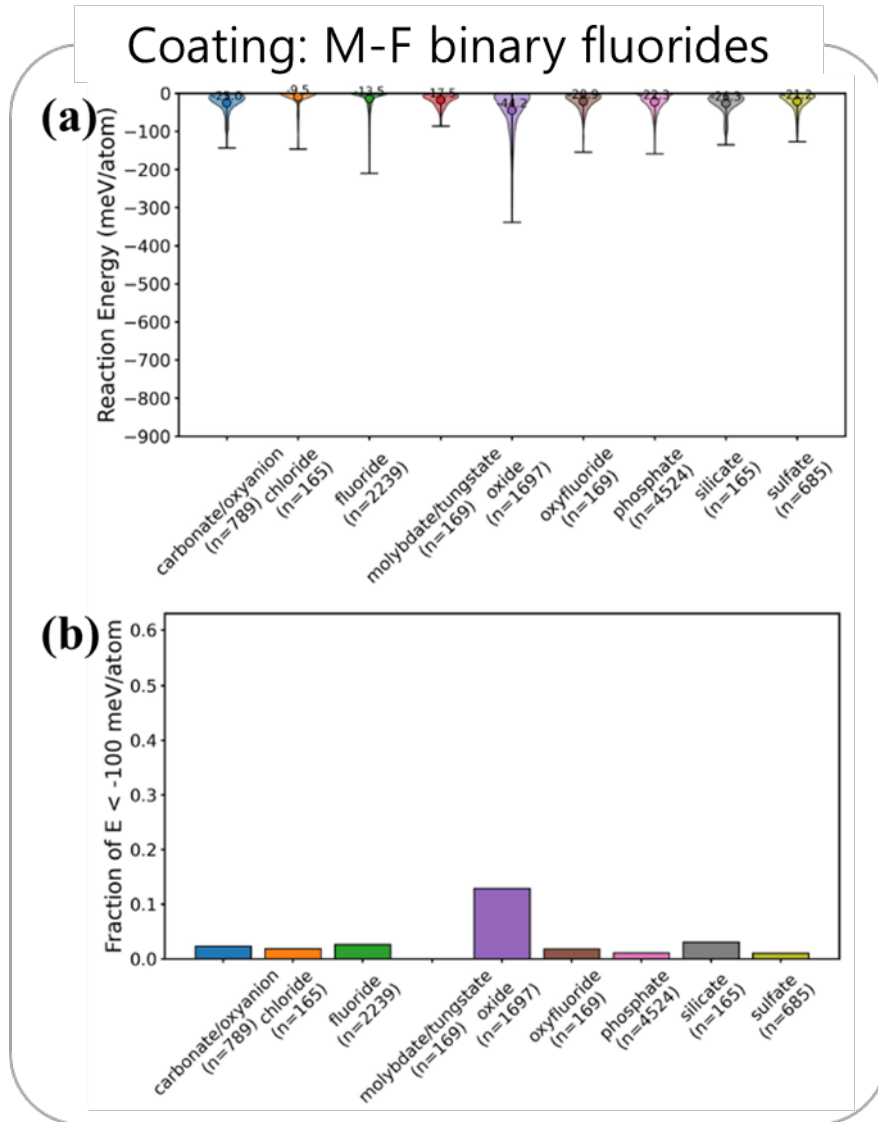

**Fig. S7.** Fluoride coating materials reaction energy distributions according to cathode subtypes. (a) Distributions of reaction energy between subtype-classified cathodes and fluoride coatings. (b) Fraction of cathode and fluoride coating combinations whose reaction energy is less than -100 meV/atom.

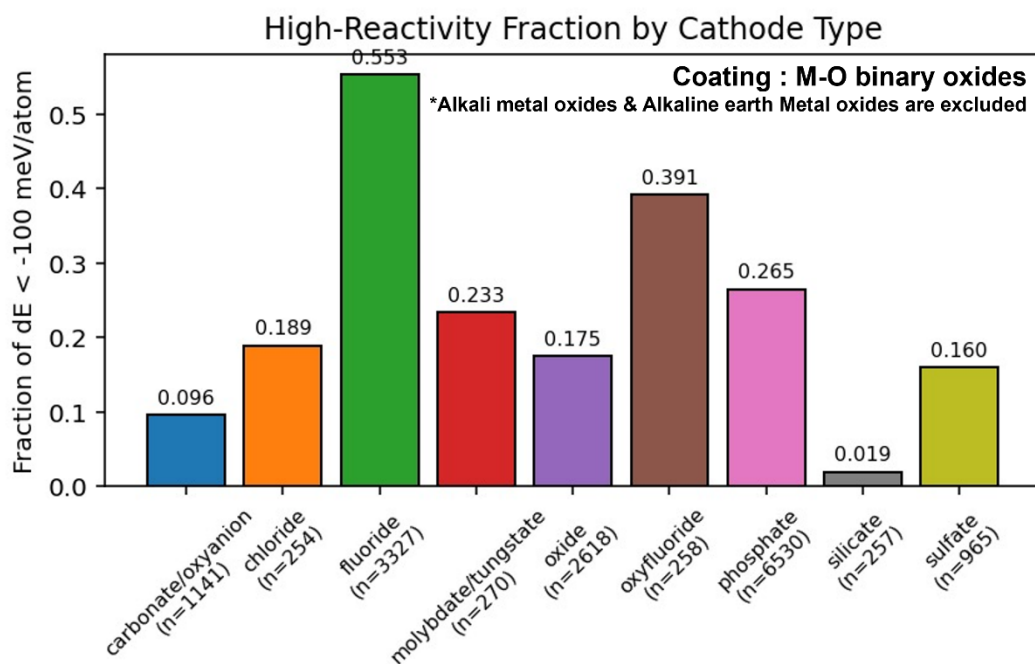

**Fig. S8.** Fraction of cathode and oxide coating combinations whose reaction energy is less than -100 meV/atom. M<sub>2</sub>O-type alkali metal oxides and MO-type alkaline earth metal oxides, identified as highly reactive coating species, are excluded to avoid the trap of the average.

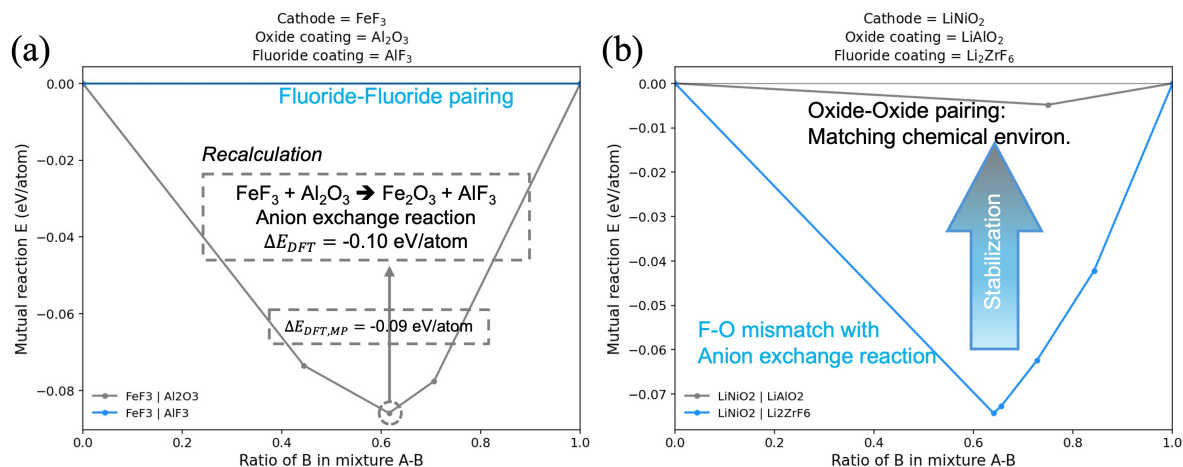

**Fig. S9.** Representative thermodynamic reaction energy landscapes for selected cathode–coating combinations, illustrating the relationship between anion chemistry and interfacial compatibility. (a) FeF<sub>3</sub>-AlF<sub>3</sub> and FeF<sub>3</sub>-Al<sub>2</sub>O<sub>3</sub> pairs with independently conducted DFT recalculation result. (b) represents LiNiO<sub>2</sub>-LiAlO<sub>2</sub> and LiNiO<sub>2</sub>-Li<sub>2</sub>ZrF<sub>6</sub> pairs. The mutual reaction energy was calculated as a function of the mixing ratio between cathode and coating compositions, where more negative values indicate a stronger thermodynamic driving force for interfacial decomposition.

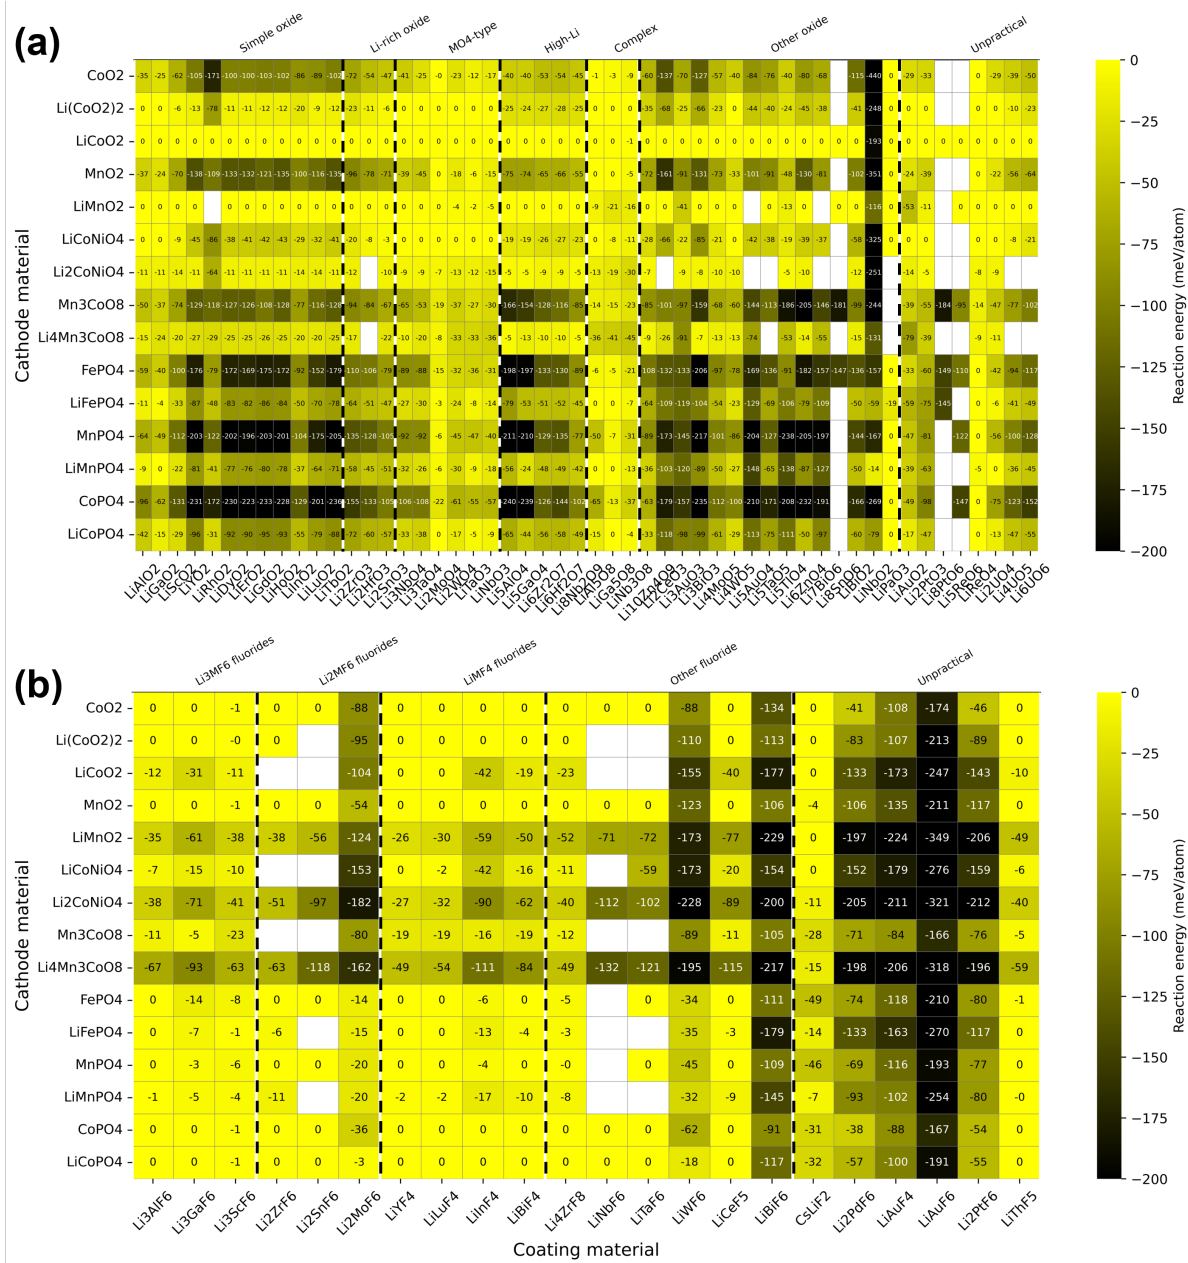

**Fig. S10.** Reaction energy landscapes presented as local heatmaps for promising/commercial cathodes, where coating material classes include (a) Li-M-O ternary oxides and (b) Li-M-F ternary fluorides. Darker colors indicate more negative  $E_{rxn}$  values.

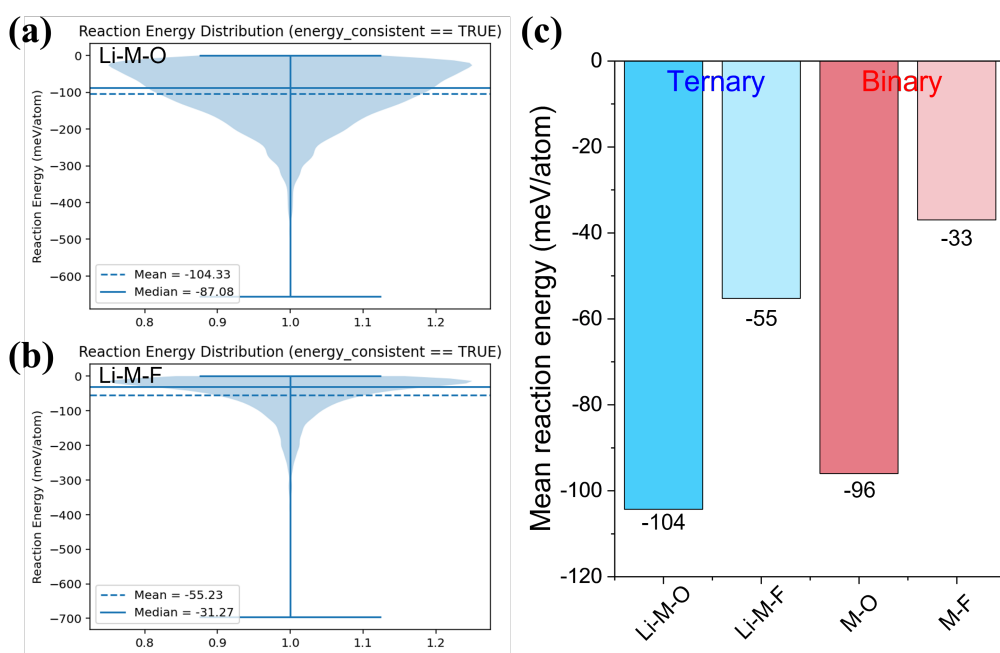

**Fig. S11.** Reaction energy distribution of Li-M-A ((a) A=oxygen and (b) A=fluorine) ternary compounds and lithium-ion battery cathode combinations. (c) Direct comparison of mean reaction energies with cathodes, between ternary oxide/fluoride compounds and binary oxide/fluoride coating materials.

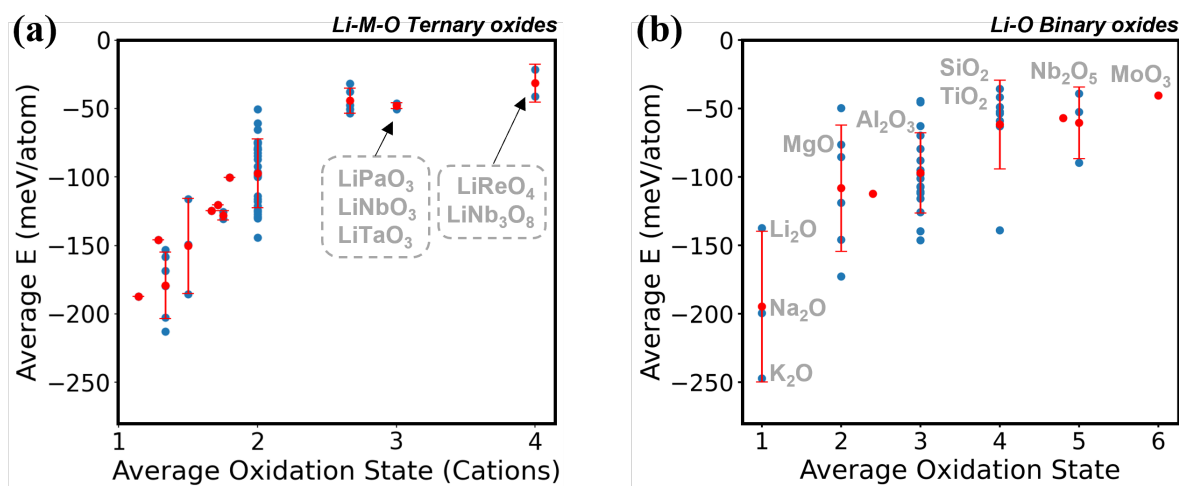

**Fig. S12.** Scatter plots (blue points) for mean reaction energy and average oxidation state of metal species in (a) Li-M-O ternary and (b) M-O binary oxide materials. Red dots and error bars represent total average and standard deviations in specific oxidation states.

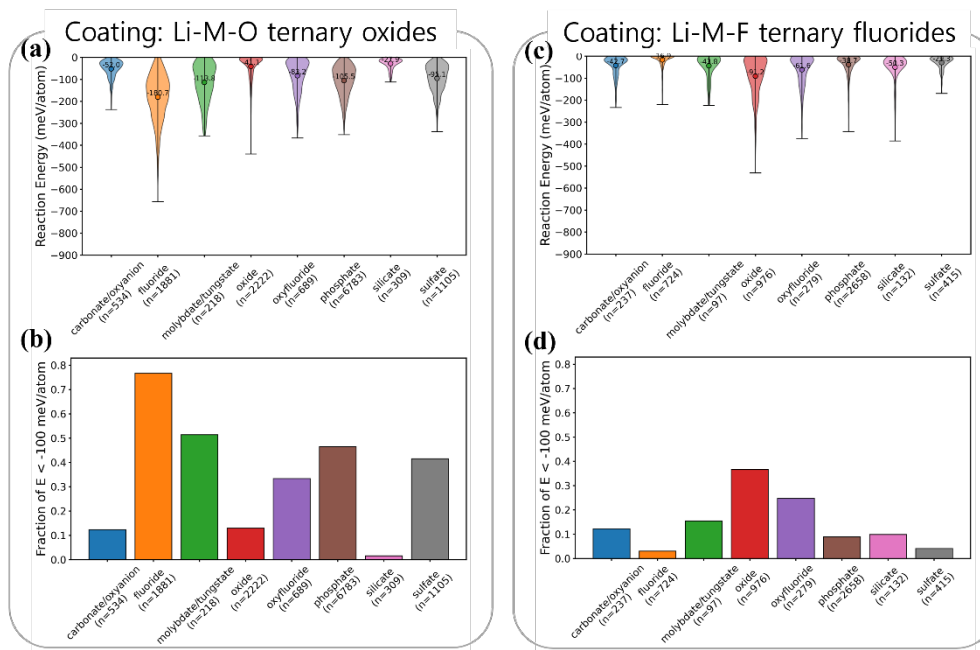

**Fig. S13.** (a) Distributions of reaction energy between subtype-classified cathodes and Li-M-O ternary coatings. (b) Fraction of cathode and Li-M-O coating combinations whose reaction energy is less than -100 meV/atom. (c) Distributions of reaction energy between subtype-classified cathodes and Li-M-F ternary coatings. (d) Fraction of cathode and Li-M-F coating combinations whose reaction energy is less than -100 meV/atom.

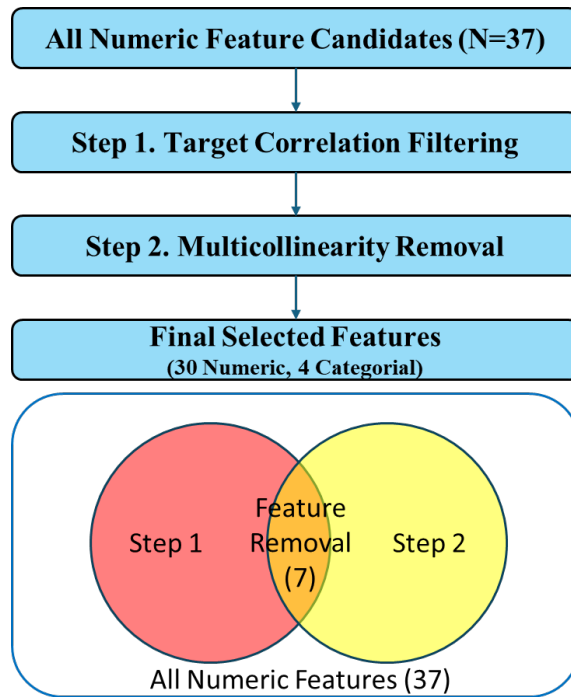

**Fig. S14.** Scheme for feature selection procedure in this work

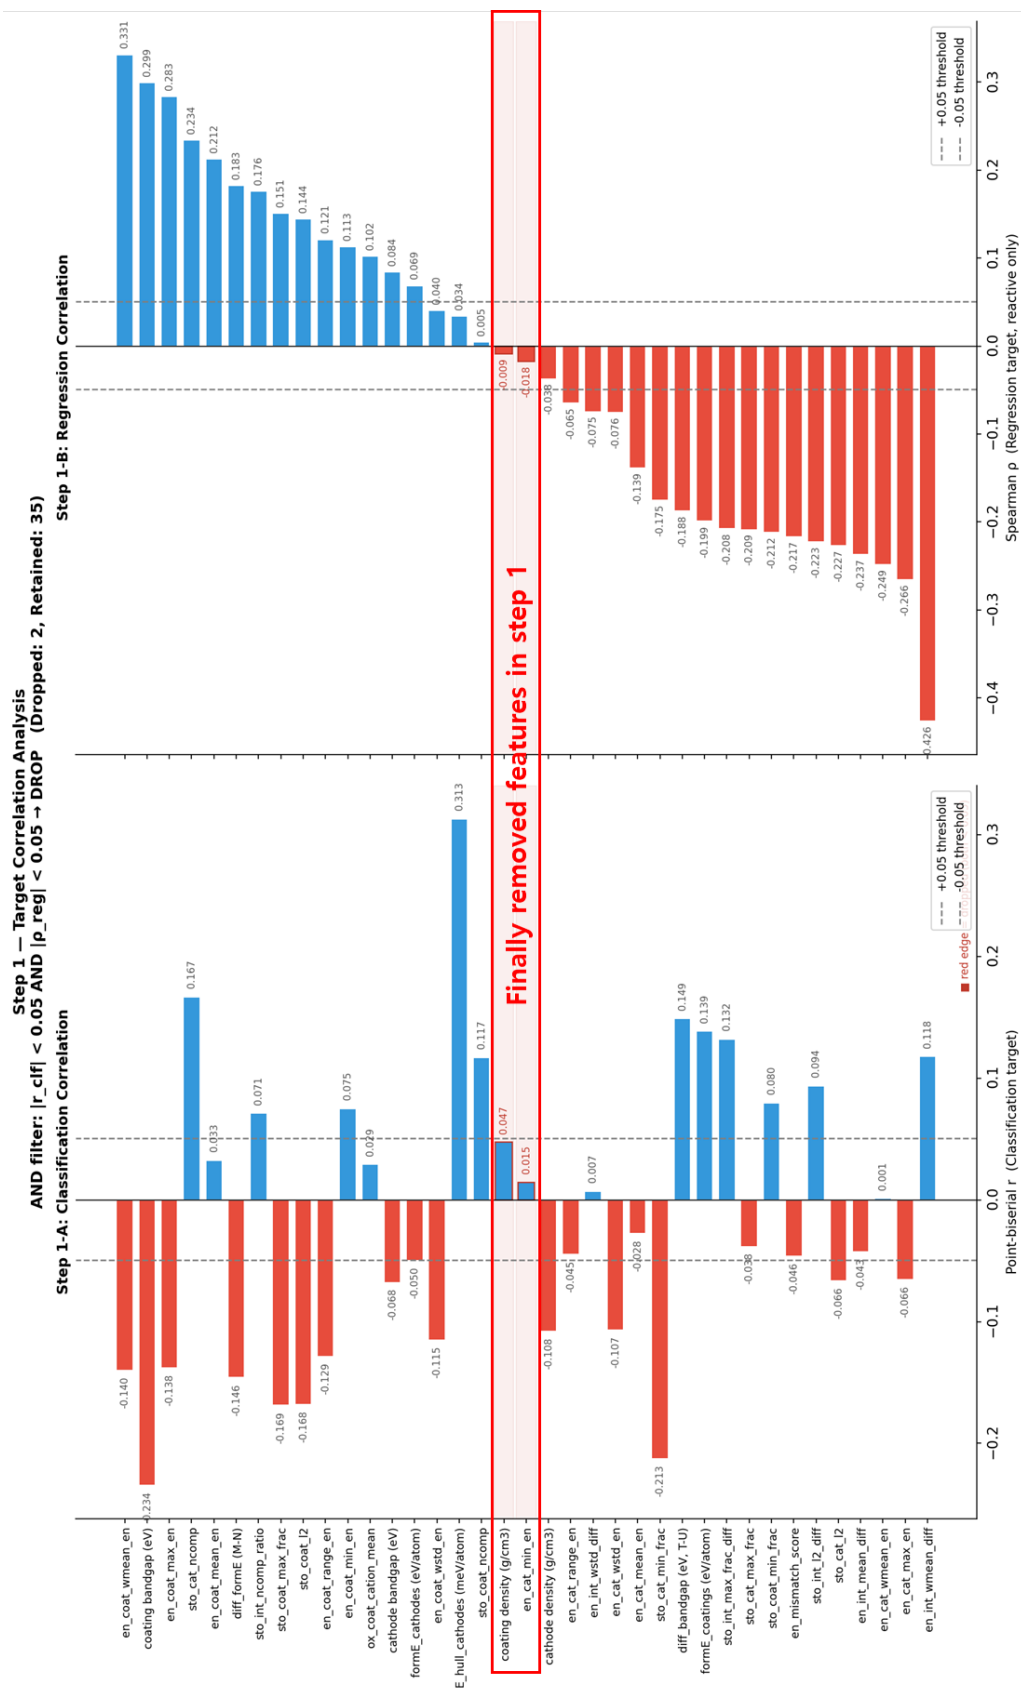

**Fig. S15.** Feature-target correlation analysis conducted in step 1 in feature selection procedure

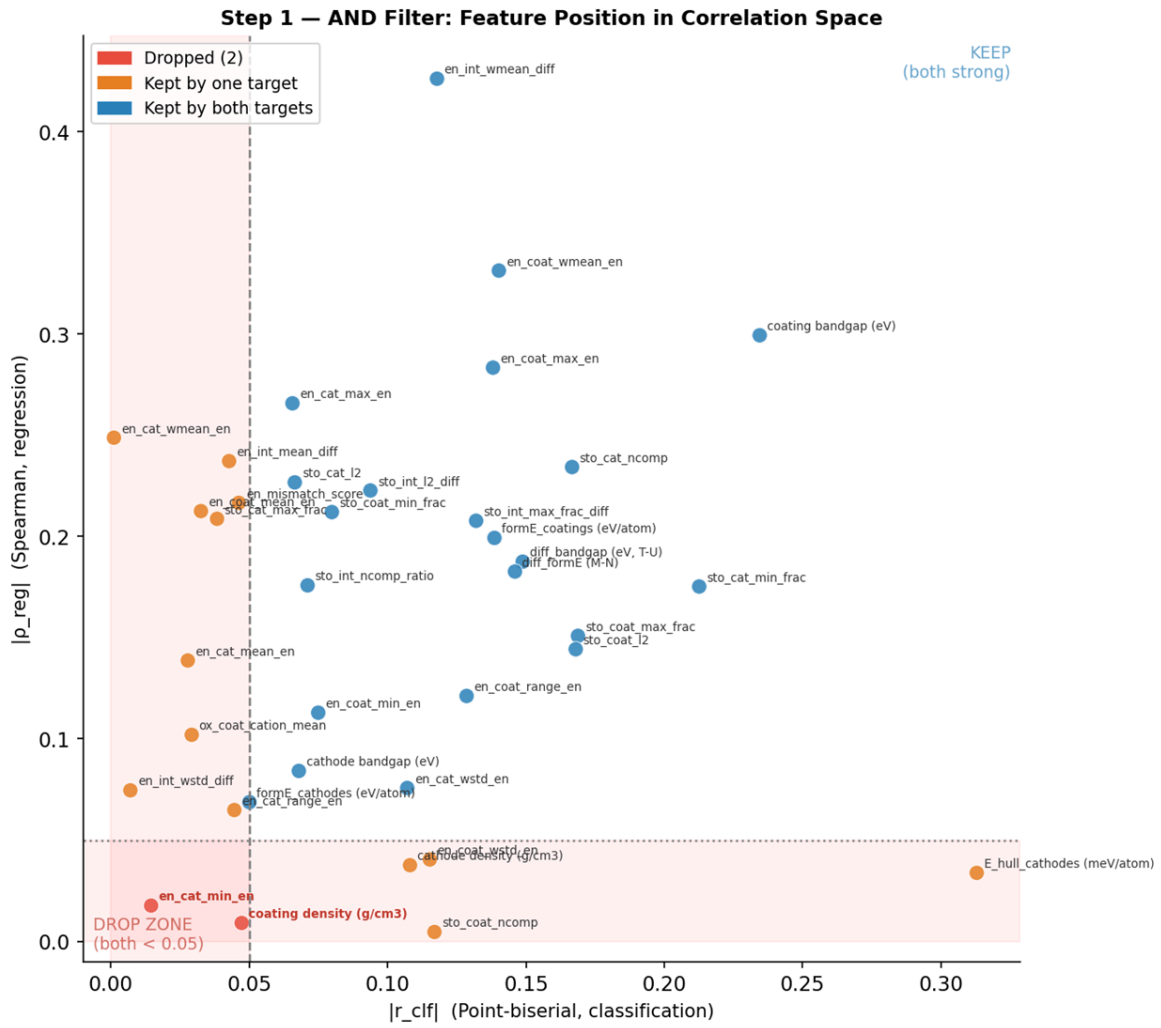

**Fig. S16.** Feature position in correlation space

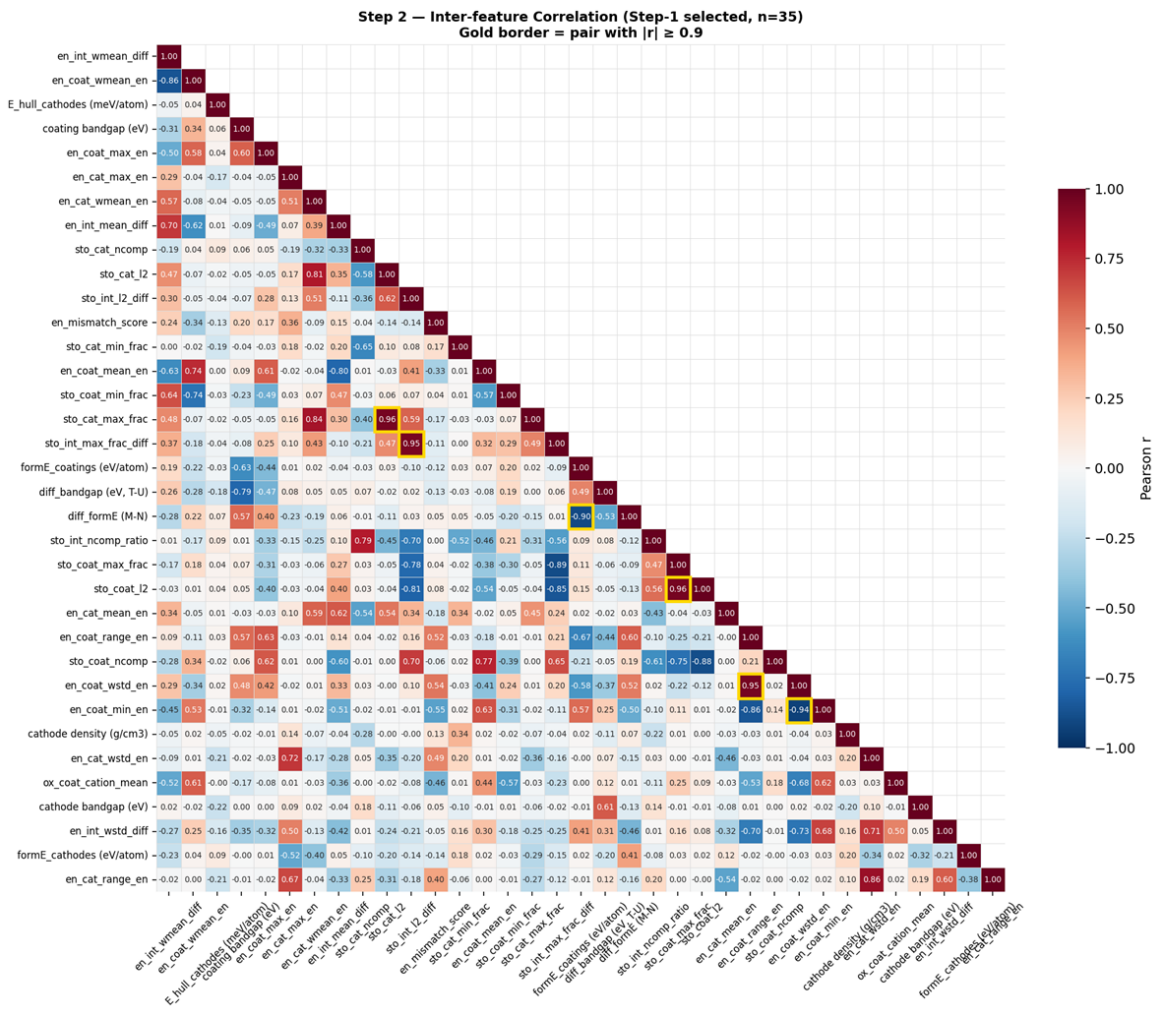

Step 2 — Multicollinearity Removal (threshold = 0.90)

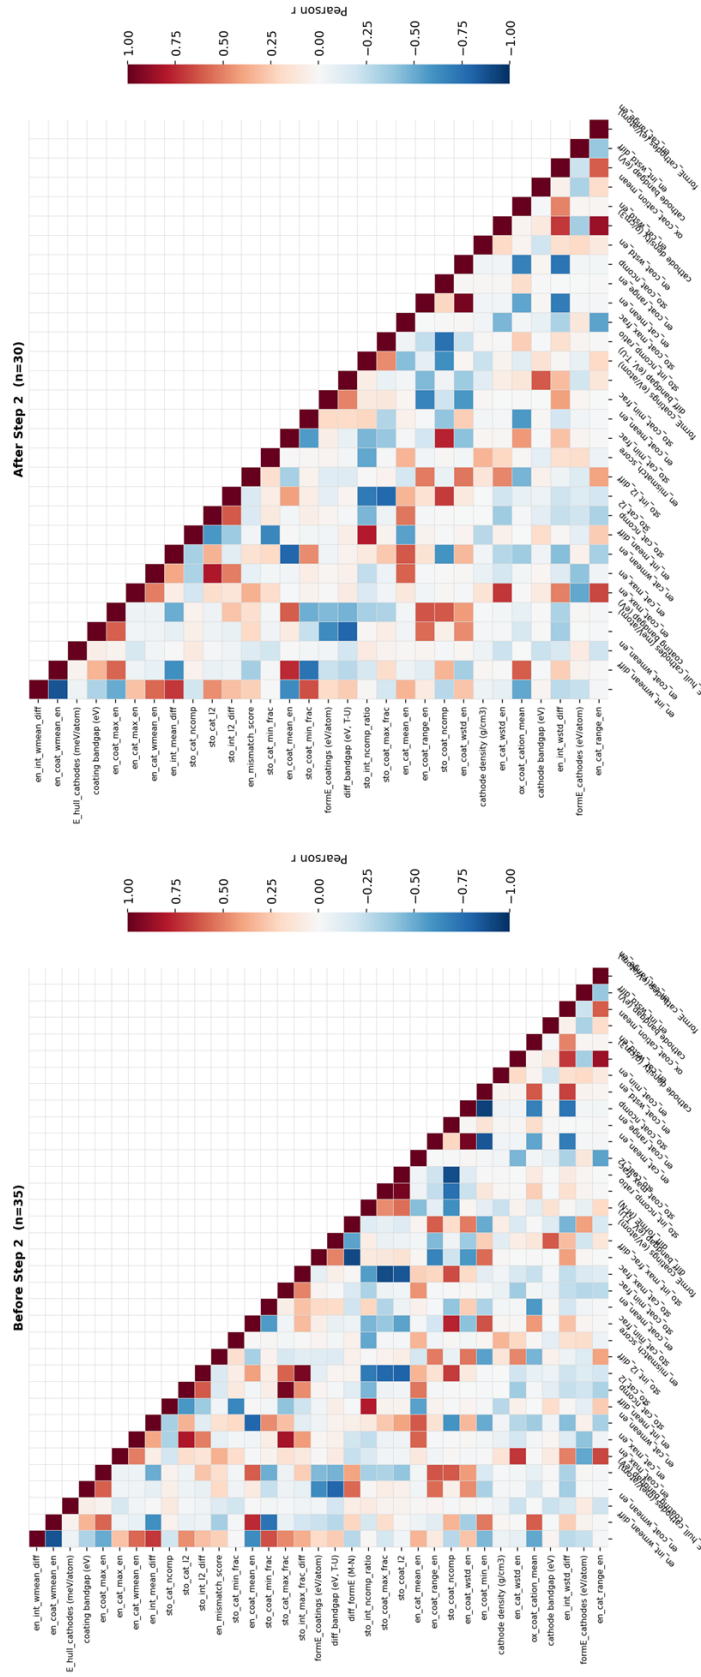

Fig. S18. Multicollinearity removal in step 2 of feature selection procedure

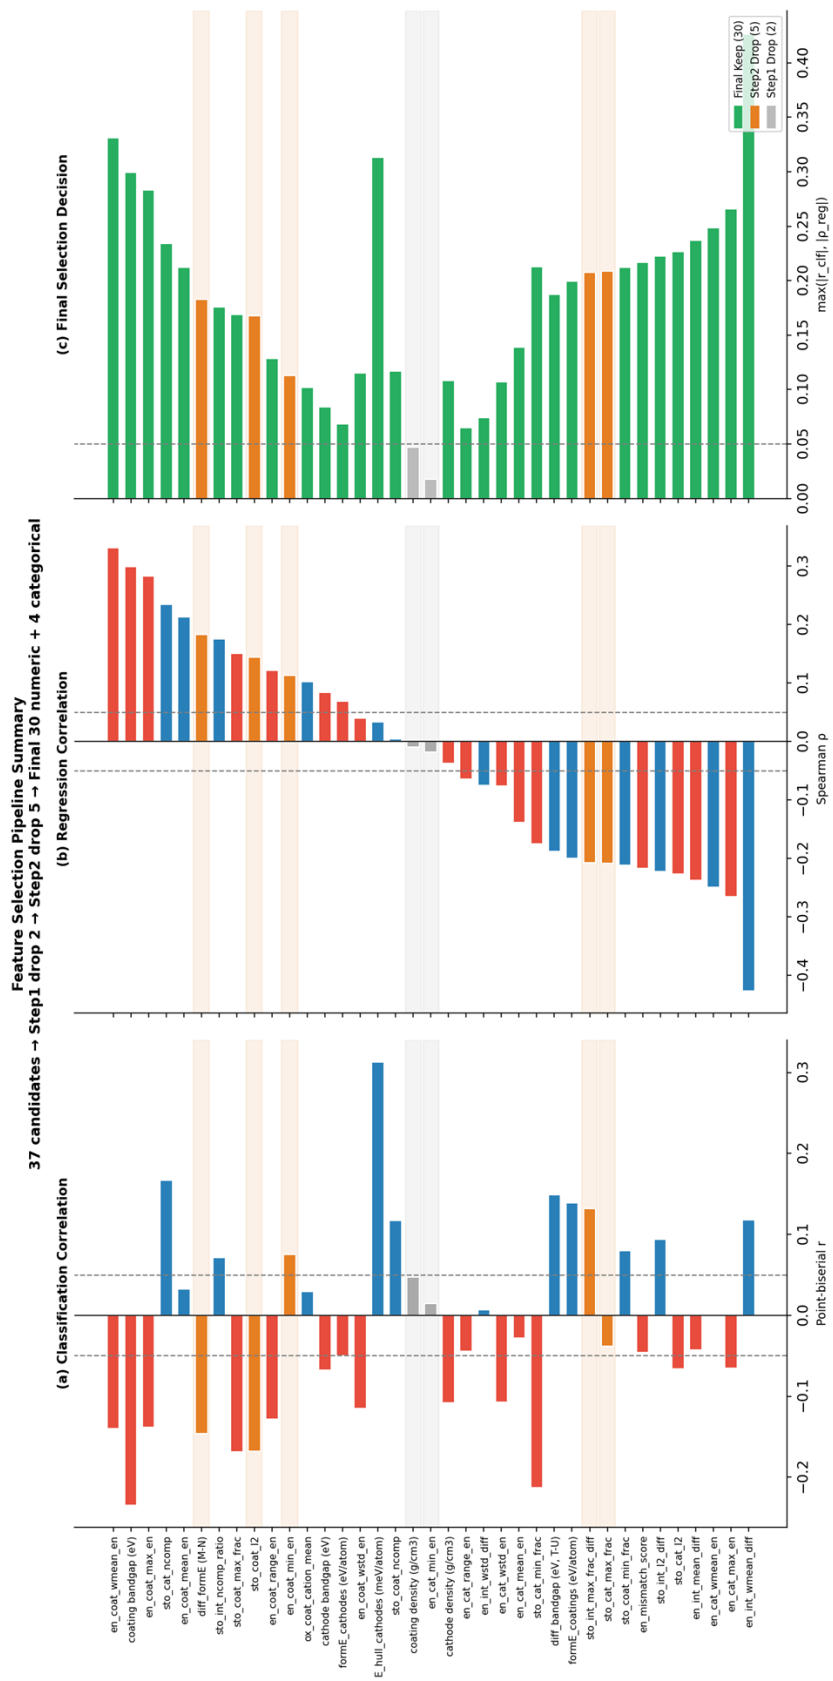

**Fig. S19.** Summary for two-step feature selection pipeline in this work

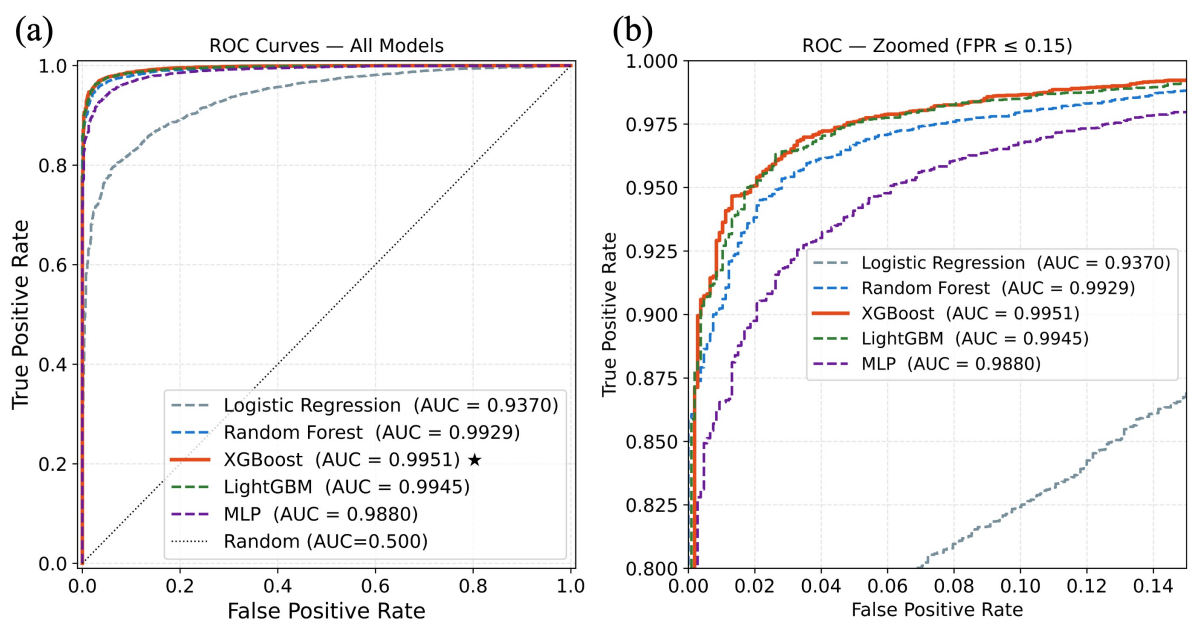

**Fig. S20.** Comparison of (a) original and (b) magnified ROC curves of trained classifiers

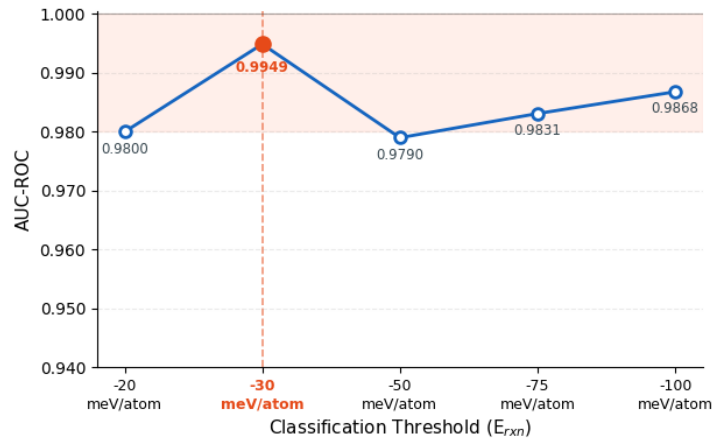

**Fig. S21.** Result of sensitivity analysis (AUC values) for varying classification threshold.

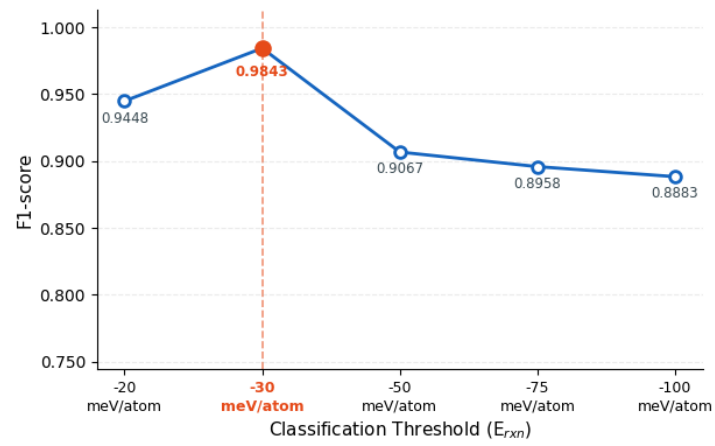

**Fig. S22.** Result of sensitivity analysis (F1-scores) for varying classification threshold.

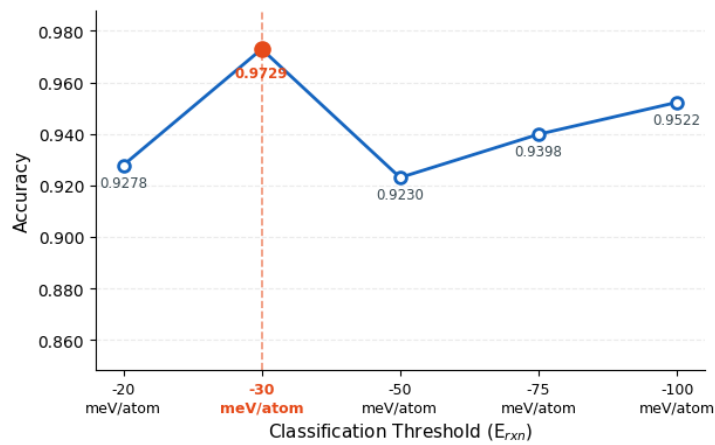

**Fig. S23.** Result of sensitivity analysis (accuracy values) for varying classification threshold.

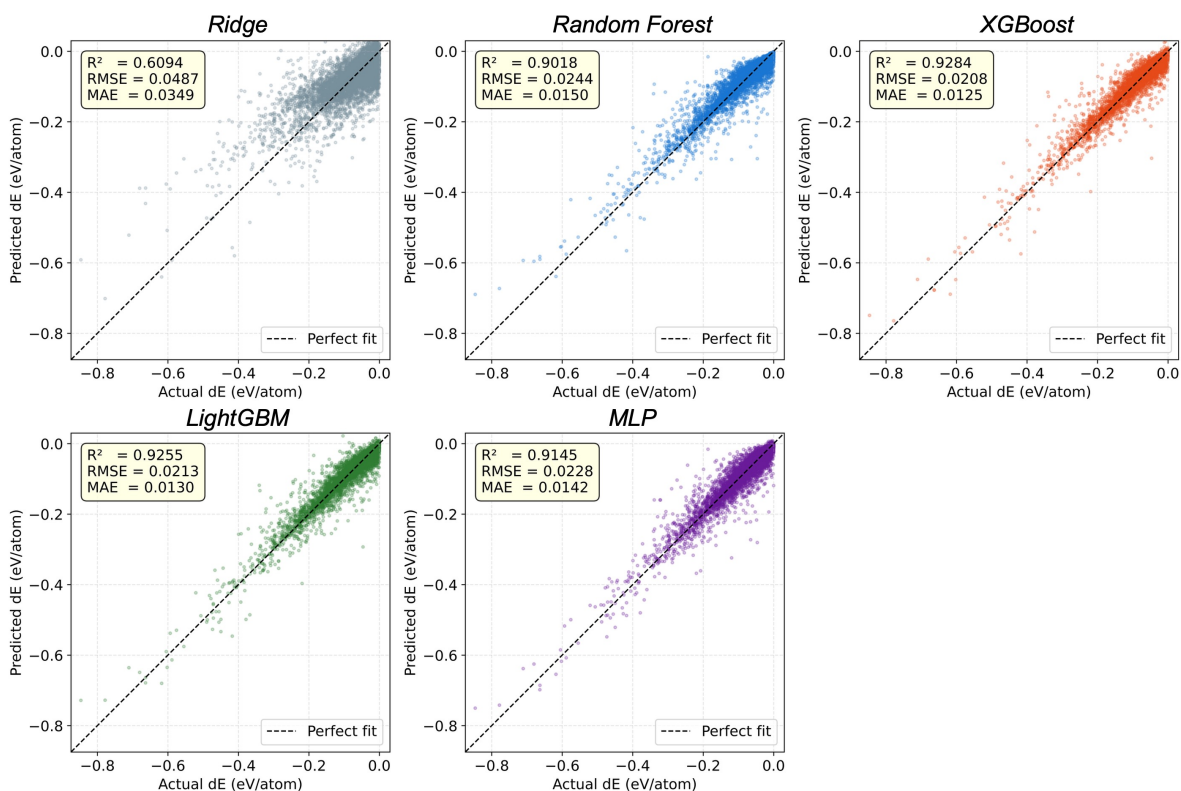

**Fig. S24.** Comparison of parity plots of five different trained regressors: Ridge, random forest, XGBoost, LightGBM, and MLP models.  $R^2$  score, RMSE, and MAE values are provided. The units of both RMSE and MAE are eV/atom.

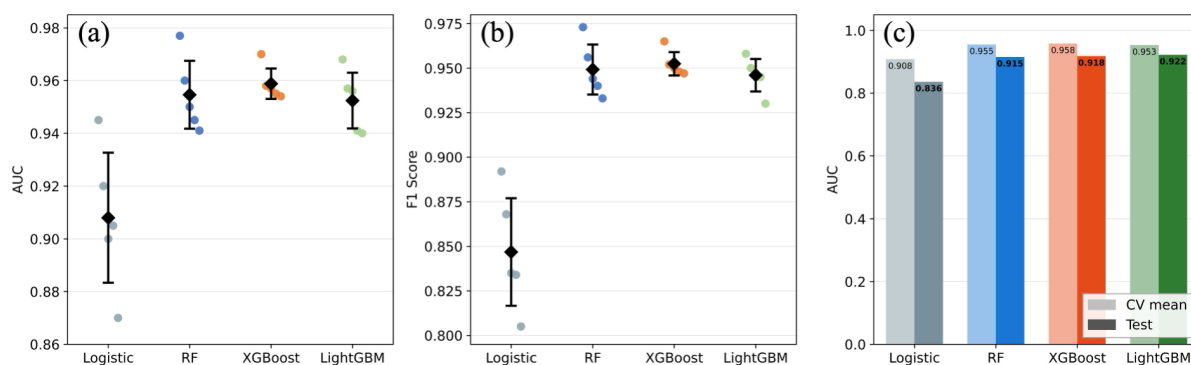

**Fig. S25.** Five-fold cross-validation (CV) test results for five classification models, where all cathode and coating materials in test set are completely not leaked to train set. (a) AUC values, (b) f1 scores, and (c) comparison between mean AUC values of CV tests and AUC of held-out test.

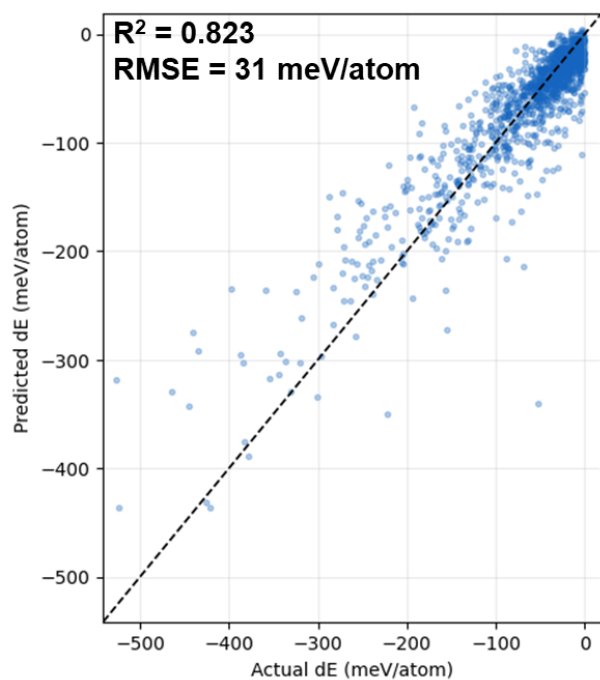

**Fig. S26.** Group-split test results of optimized XGBoost  $E_{\text{rxn}}$  regressor. Again, materials of test set were entirely excluded from the training set.  $R^2$  score and RMSE values are corresponding to 0.823 and 31 meV/atom, respectively.

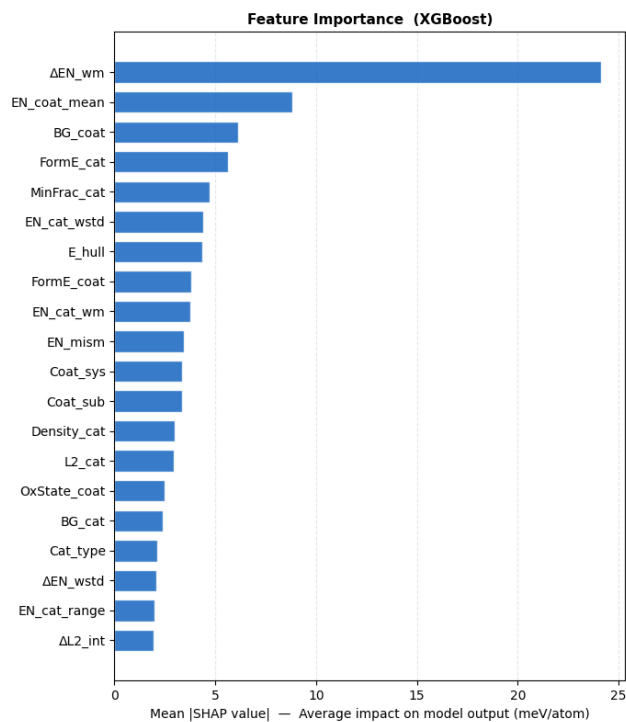

**Fig. S27.** Top 20 important features in optimized XGBoost-based reaction energy regressor for total dataset including all of oxide, oxyfluoride, fluoride coating materials.

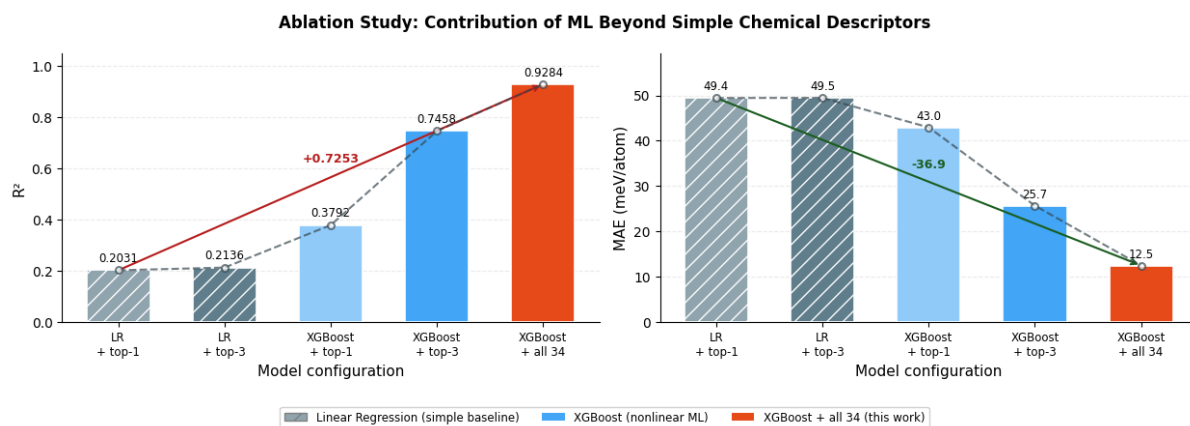

**Fig. S28.** Conducted ablation study where two logistic regression (LR) and XGBoost models, and use of top 1, 3, and all features are considered in regression task for predicting mutual reaction energy ( $E_{\text{rxn}}$ ). Left and right panels show the evolution of  $R^2$  scores and mean absolute error (MAE) values, respectively.

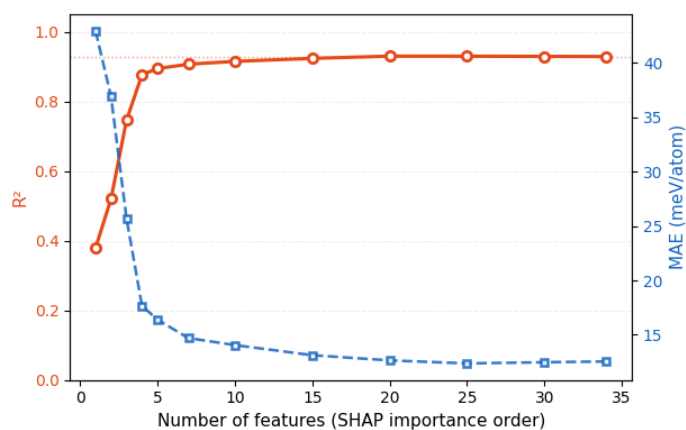

**Fig. S29.** Cumulative  $R^2$  curve of trained XGBoost-based model for reaction energy prediction.
